# Supplementary material for: Chemical Characterization and Antioxidant Activity of Nine Hypericum Species from Greece
Source: MDPI journal article supplement (doi:10.3390/antiox12040899), 2023-04-08

## **Chemical characterization and antioxidant activity of nine *Hypericum* species from Greece**

Eleni Kakouri<sup>1</sup>, Panayiotis Trigas<sup>2</sup>, Dimitra Daferera<sup>1</sup>, Efstathia Skotti<sup>3</sup>, Petros A. Tarantilis<sup>1</sup>, Charalabos Kanakis<sup>1\*</sup>

<sup>1</sup> Laboratory of Chemistry, Department of Food Science and Human Nutrition, School of Food and Nutritional Sciences, Agricultural University of Athens, Iera Odos 75, 118 55, Greece

<sup>2</sup> Laboratory of Systematic Botany, Department of Crop Science, School of Plant Sciences, Agricultural University of Athens, Iera Odos 75, 118 55, Greece

<sup>3</sup> Department of Food Science and Technology, Ionian University, Terma Leoforou Vergoti, 28100 Argostoli, Cephalonia, Greece

\*Correspondence: [chkanakis@aua.gr](mailto:chkanakis@aua.gr); Tel.: +30-2105294249

**Table S1. Collection data of the *Hypericum* species examined**

| <b>Taxon</b>                                       | <b>Collection site</b> | <b>Latitude</b> | <b>Longitude</b> | <b>Elevation<br/>(m)</b> | <b>Habitat</b>      | <b>Voucher<br/>number</b> |
|----------------------------------------------------|------------------------|-----------------|------------------|--------------------------|---------------------|---------------------------|
| <i>H. cycladicum</i>                               | Andros Island          | 37°54'          | 24°52'           | 30                       | Phrygana            | 12285                     |
| <i>H. delphicum</i>                                | Evvia Island           | 38°53'          | 23°52'           | 1000                     | Forest<br>clearings | 12281                     |
| <i>H. fragile</i>                                  | Evvia Island           | 38°32'          | 24°01'           | 420                      | Cliffs              | 12283                     |
| <i>H. olympicum</i>                                | Evvia Island           | 38°36'          | 23°51'           | 890                      | Rocky<br>slopes     | 12288                     |
| <i>H. perfoliatum</i>                              | Mt. Parnon             | 37°15'          | 22°39'           | 1050                     | Forest              | 12282                     |
| <i>H. perforatum</i>                               | Andros Island          | 37°50'          | 24°53'           | 560                      | Rocky<br>slopes     | 12280                     |
| <i>H. rumeliacum</i><br>subsp.<br><i>apollinis</i> | Mt. Parnassos          | 38°33'          | 22°34'           | 1760                     | Rocky<br>slopes     | 12286                     |
| <i>H. tetrapterum</i>                              | Evvia Island           | 38°36'          | 23°51'           | 910                      | Wet places          | 12287                     |
| <i>H. vesiculosum</i>                              | Mt. Chelmos            | 38°05'          | 22°10'           | 910                      | Woodland            | 12284                     |

**Table S2: Tentatively identified compounds in *H. perfoliatum* extract**

| <i>Hypericum perfoliatum</i>      |      |                                                       |                                                                                     |                  |               |                 |          |            |       |
|-----------------------------------|------|-------------------------------------------------------|-------------------------------------------------------------------------------------|------------------|---------------|-----------------|----------|------------|-------|
| Compound name                     | Rt   | ESI+<br>Product ions                                  | ESI-<br>Product ions                                                                | m/z experimental |               | m/z theoretical |          | $\Delta m$ |       |
|                                   |      |                                                       |                                                                                     | +                | -             | +               | -        | +          | -     |
| Procyanidin B type                | 1.39 | 307.9972;275.9969;<br>263.0556;<br>139.0344; 127.0365 | -                                                                                   | 611.1398         | -             | 611.1395        |          | 0.44       |       |
| B-type trimer<br>procyanidin (C1) | 1.58 | -                                                     | 739.1455;714.14;<br>695.1275;451.09;<br>289.0708;245.04;<br>179.0442                | -                | 865.2014      | -               | 865.1985 | -          | 3.35  |
| Procyanidin B1                    | 2.28 | -                                                     | standard solution                                                                   | 577.1331         |               | 577.1351        |          |            | -3.46 |
| Catechin                          | 2.80 | standard solution                                     | standard solution                                                                   | 291.0854         | 289.0717      | 291.0863        | 289.0717 | -3.12      | 0     |
| Procyanidin B type                | 3.03 | 425.1754;291.0852;<br>287.0536                        | 407.0761;289.070;<br>245.0811;205.0503                                              | 579.1477         | 577.134       | 579.1497        | 577.1351 | -3.45      | -1.9  |
| B-type trimer<br>procyanidin (C2) | 3.69 | -                                                     | 713.1518;695.1398;<br>577.1325;451.1012;<br>289.0710;243.0298;<br>161.0243; 125.024 | -                | 865.1966      | -               | 865.1985 | -          | -2.2  |
| Epicatechin                       | 3.89 | standard solution                                     | standard solution                                                                   | 291.0851         | 291.0863<br>1 | 289.0716        | 289.0717 | -4.12      | -0.34 |
| Apigenin hexoside                 | 5.76 | 271.0581; 153.017;<br>121.0275; 119.05                | -                                                                                   | 433.1114         | -             | 433.1129        | -        | -3.46      | -     |
| Luteolin<br>malonylhexoside       | 6.14 | 287.0526;<br>137.0231; 135.0408                       | 285.0394;257.0448;<br>241.0499;133.0294;                                            | 535.1067         | 533.0923      | 535.1082        | 533.0937 | -2.80      | -2.63 |
| Rutin                             | 6.53 | -                                                     | Standard solution                                                                   | -                | 609.1449      | -               | 609.1461 | -1.99      |       |
| Hyperoside                        | 6.55 | 303.0483; 153.0172                                    | 301.0317;<br>283.0266; 271.0222                                                     | 465.1012         | 463.0872      | 465.1027        | 463.0882 | -3.33      | -2.15 |
| Luteolin glucuronide              | 6.58 | -                                                     | 300.0269;243.0287;<br>241.0095;217.0453;<br>119.0402;175.0354;<br>151.0035          | -                | 461.0717      | -               | 461.0725 | -          | -1.84 |

|                               |       |                                                                                      |                                                                            |          |          |          |          |       |       |
|-------------------------------|-------|--------------------------------------------------------------------------------------|----------------------------------------------------------------------------|----------|----------|----------|----------|-------|-------|
| Isoquercitrin                 | 6.73  | 303.0489                                                                             | 301.0316;<br>300.0274;<br>283.0248; 229.0479                               | 465.1009 | 463.0872 | 465.1027 | 463.0882 | -3.98 | -2.16 |
| Quercetin<br>malonylhexoside  | 6.79  | -                                                                                    | 301.0323;283.0243;<br>229.0477;151.0038;<br>107.0149                       | -        | 549.087  | -        | 549.0885 | -     | -2.73 |
| Quercitrin                    | 7.04  | standard solution                                                                    | standard solution                                                          | 449.106  | 447.0918 | 449.1078 | 447.0933 | -4.00 | -3.35 |
| Kaempferol<br>glucoside       | 7.21  | standard solution                                                                    | standard solution                                                          | 449.1081 | 447.0918 | 449.1078 | 447.0933 | 0.67  | -3.35 |
| Kaempferol<br>malonylhexoside | 7.50  | 287.0535; 241.043;<br>231.0594;258.0471;<br>165.0188;153.0153;<br>133.0266; 121.0268 | 285.0388;267.0287;<br>243.0283;239.0336;<br>213.0536;199.0387;<br>151.0045 | 535.1065 | 533.0923 | 535.1082 | 533.0937 | -3.23 | -2.63 |
| I3.II8 biapigenin             | 8.82  | -                                                                                    | 443.0428;385.0718;<br>151.0038                                             | -        | 537.0808 | -        | 537.0827 | -3.57 | -3.54 |
| Pseudohypericin               | 10.11 | -                                                                                    | 487.0458;457.0784;<br>459.0951                                             | -        | 519.0702 | -        | 519.0722 | -3.85 | -3.77 |
| Hyperforin                    | 14.57 | -                                                                                    | standard solution                                                          | -        | 535.377  | -        | 535.3793 | -     | 4.30  |

**Table S3: Tentatively identified compounds in *H. rumeliacum* subsp. *apollinis* extract**

| <i>H. rumeliacum</i> subsp. <i>apollinis</i> |      |                   |                                                               |                         |          |                        |           |            |       |
|----------------------------------------------|------|-------------------|---------------------------------------------------------------|-------------------------|----------|------------------------|-----------|------------|-------|
| Compound name                                | Rt   | ESI+              | ESI-                                                          | <i>m/z</i> experimental |          | <i>m/z</i> theoretical |           | $\Delta m$ |       |
|                                              |      |                   |                                                               | +                       | -        | +                      | -         | +          | -     |
| Neo-chlorogenic acid                         | 2.24 | -                 | 191.0558;135.0448;<br>85.0294                                 | -                       | 353.0871 | -                      | 353.08781 | -          | -2.01 |
| Chlorogenic acid                             | 3.70 | standard solution | standard solution                                             | 355.1019                | 353.0875 | 355.1024               | 353.0878  | -1.41      | -0.85 |
| p-Coumaroylquinic<br>acid                    | 5.03 | -                 | 191.0558;163.1114;<br>137.0229; 119.0497                      | -                       | 337.0923 | -                      | 337.0929  |            | -1.75 |
| Myricetin glucoside                          | 5.80 | -                 | standard solution                                             | -                       | 479.0824 | -                      | 479.0831  | -          | -1.46 |
| Myricetin arabinoside                        | 6.26 | -                 | 316.0220;299.0169;<br>271.0237;245.0425;<br>151.003; 137.0243 | -                       | 449.0719 | -                      | 449.0725  | -          | -1.34 |
| Myricitrin                                   | 6.3  | standard solution | standard solution                                             | 465.1023                | 463.0874 | 465.1027               | 463.0882  | -0.86      | -1.73 |
| Rutin                                        | 6.50 | -                 | standard solution                                             | -                       | 609.1437 | -                      | 609.14611 |            | -3.94 |

|                             |       |                                 |                                                                |          |          |           |           |       |       |
|-----------------------------|-------|---------------------------------|----------------------------------------------------------------|----------|----------|-----------|-----------|-------|-------|
| Hyperoside                  | 6.55  | 303.0485;153.0175               | 316.0217; 300.027;<br>281.0072;271.0243;<br>229.0216           | 465.1022 | 463.0872 | 465.1027  | 463.0882  | -1.07 | -2.16 |
| Isoquercitrin               | 6.9   | -                               | 316.0217;271.0241;<br>255.0295; 151.0036                       | -        | 463.0873 | -         | 463.0882  | -     | -1.94 |
| Kaempferol glucoside        | 7.11  | -                               | standard solution                                              | -        | 447.0924 | -         | 447.0932  | -     | -1.79 |
| Quercetin arabinofuranoside | 7.13  | -                               | 300.0273;283.0226;<br>271.0244;229.0121;<br>169.0278; 151.0039 | -        | 433.0767 | -         | 433.0776  | -     | 2.08  |
| Quercitrin                  | 7.15  | standard solution               | standard solution                                              | 449.1072 | 447.0923 | 449.10784 | 447.0932  | -1.33 | -2.01 |
| Quercetin                   | 7.85  | -                               | standard solution                                              | -        | 301.0347 | -         | 301.03538 | -     | -2.32 |
| I3.II8 biapigenin           | 8.78  | 445.0501;<br>387.0839; 153.0173 | 443.0381;385.0705;<br>151.0034                                 | 539.0969 | -        | 539.09727 | -         | -0.74 | -     |
| Pseudohypericin             | 10.22 | -                               | 519.0698;487.0437;<br>421.06                                   | -        | 519.0704 | -         | 519.07216 | -     | -3.47 |
| Protohypericin              | 11.32 | -                               | 433.0705;407.0827;<br>363.1039                                 | -        | 505.0926 | -         | 505.0929  | -     | -0.59 |
|                             |       |                                 |                                                                |          |          |           |           |       |       |

**Table S4: Tentatively identified compounds in *H. vesiculosum* extract**

| <i>H. vesiculosum</i>    |      |                                |                                                      |                         |          |                        |          |            |       |
|--------------------------|------|--------------------------------|------------------------------------------------------|-------------------------|----------|------------------------|----------|------------|-------|
| Compound name            | Rt   | ESI+                           | ESI-                                                 | <i>m/z</i> experimental |          | <i>m/z</i> theoretical |          | $\Delta m$ |       |
|                          |      |                                |                                                      | +                       | -        | +                      | -        | +          | -     |
| Vanillic acid hexoside   | 2.03 | -                              | 167.0329;152.0107;<br>137.0218;123.0438;<br>164.0676 | -                       | 329.0873 | -                      | 329.0878 | -          | -1.55 |
| Neo-chlorogenic acid     | 2.24 | -                              | 191.0560;161.0246;<br>127.0397                       | -                       | 353.0875 | -                      | 353.0878 | -          | -0.88 |
| Procyanidin B type       | 3.01 | -                              | 407.0747;289.0708;<br>245.0816; 205.0513             | -                       | 577.1349 | -                      | 577.1351 | -          | -0.35 |
| Chlorogenic acid         | 3.45 | -                              | standard solution                                    | -                       | 353.0882 | -                      | 353.0878 | -          | 1.13  |
| Myricetin glucoside      | 5.87 | -                              | standard solution                                    | -                       | 479.081  | -                      | 479.0831 | -          | -4.38 |
| Luteolin malonylhexoside | 6.04 | 287.0531;137.0227;<br>135.0433 | 285.0392;257.0467;<br>241.049; 175.04;               | 535.10<br>84            | 533,0926 | 535.<br>1082           | 533,0937 | 0.<br>37   | -2,06 |

|                               |       |                                                                                      |                                                                                     |              |          |              |          |               |       |
|-------------------------------|-------|--------------------------------------------------------------------------------------|-------------------------------------------------------------------------------------|--------------|----------|--------------|----------|---------------|-------|
|                               |       |                                                                                      | 133.0295                                                                            |              |          |              |          |               |       |
| Rutin                         | 6.52  | -                                                                                    | standard solution                                                                   | -            | 609.1447 | -            | 609.1461 | -             | -2.3  |
| Hyperoside                    | 6.53  | 303.0491; 153.0179                                                                   | 301.0322;300.0269;<br>283.0257; 271.0244                                            | 465.10<br>23 | 463,0874 | 465.<br>1027 | 463,0882 | -<br>0.<br>86 | -1,73 |
| Quercetin<br>malonylhexoside  | 6.81  | 303.0493;285.0379;<br>257.0433;229.0472;<br>165.0187;153.0174;<br>149.0243; 137.0218 | 301.0328;300.0269;<br>283.0229;229.0487;<br>151.0031;107.0137;                      | 551.10<br>33 | 549,0873 | 551.<br>1031 | 549,0885 | 0.<br>36      | -2,18 |
| Isoquercitrin                 | 6.81  | -                                                                                    | 301.322; 300.0268;<br>271.0241;255.0295;<br>151.0037                                | -            | 463.0873 | -            | 463.0882 | -             | -1.94 |
| Quercitrin                    | 7.05  | -                                                                                    | standard solution                                                                   | -            | 447.0922 | -            | 447.0932 | -             | -2.24 |
| Kaempferol rutinoside         | 7.12  | -                                                                                    | 285.0392;267.0296;<br>257.0294;241.0497;<br>239.036; 213.0551;<br>199.0402; 151.003 | -            | 593.1500 | -            | 593.1511 | -             | -1.85 |
| Kaempferol<br>malonylhexoside | 7.53  | -                                                                                    | 285.0387;267.0306;<br>239.0355;213.0574;<br>199.0401; 151.0031                      | -            | 533.0927 | -            | 533.0937 | -             | -1.87 |
| Quercetin                     | 7.92  | -                                                                                    | standard solution                                                                   | -            | 301.0351 | -            | 301.0353 | -             | -0.66 |
| I3.II8 biapigenin             | 8.86  | -                                                                                    | 443.0396;385.0702;<br>151.0033                                                      | -            | 537.0814 | -            | 537.0827 | -             | -2.42 |
| Amentoflavone                 | 9.95  | -                                                                                    | standard solution                                                                   | -            | 537.081  | -            | 537.0827 |               | -3.16 |
| Pseudohypericin               | 10.03 | -                                                                                    | 519.07; 487.0421;<br>471.046                                                        | -            | 519.0701 | -            | 519.0722 | -             | -4.05 |
| Protohypericin                | 11.78 | -                                                                                    | 435.085; 407.074                                                                    | -            | 505.0933 | -            | 505.0923 | -             | -1.98 |

**Table S5: Tentatively identified compounds in *H. cycladicum* extract**

| <i>H. cycladicum</i>                  |      |                                                                                      |                                                                                      |                  |          |                 |          |            |       |
|---------------------------------------|------|--------------------------------------------------------------------------------------|--------------------------------------------------------------------------------------|------------------|----------|-----------------|----------|------------|-------|
| Compound name                         | Rt   | ESI+                                                                                 | ESI-                                                                                 | m/z experimental |          | m/z theoretical |          | $\Delta m$ |       |
|                                       |      |                                                                                      |                                                                                      | +                | -        | +               | -        | +          | -     |
| Neo-chlorogenic acid                  | 2.24 | -                                                                                    | 191.0566;<br>135.0449; 85.0299                                                       | -                | 353.0871 |                 | 353.0878 | -          | -1.98 |
| Procyanidin B1                        | 2.49 | -                                                                                    | standard solution                                                                    | -                | 577.1345 | -               | 577.1351 | -          | -1.04 |
| Procyanidin B type                    | 3.00 | -                                                                                    | 407.0766;<br>289.0717; 245.082;<br>205.0482                                          | -                | 577.1345 | -               | 577.1351 | -          | -1.04 |
| Chrologenic acid                      | 3.46 | -                                                                                    | standard solution                                                                    | -                | 353.0871 | -               | 353.0878 | -          | -1.98 |
| Procyanidin B type-<br>Procyanidin C2 | 3.78 | -                                                                                    | 695.1386;575.1138;<br>287.0534;243.0275;<br>161.0243; 125.0243                       | -                | 865.1981 | -               | 865.1985 | -          | -0.42 |
| Apigenin hexoside                     | 5.8  | 271.0581;153.0167;<br>121.0283; 119.05                                               | -                                                                                    | 433.1121         | -        | 433.1129        | -        | -1.85      | -     |
| Luteolin<br>malonylhexoside           | 5.99 | 287.0544;137.0235;<br>135.0458                                                       | 285.0383; 257.047;<br>241.0498; 175.04;<br>133.0293                                  | 535.1073         | 533.0923 | 535.1082        | 533.0937 | -1.68      | -2.63 |
| Luteolin glucoside                    | 6.33 | -                                                                                    | standard solution                                                                    | -                | 447.0924 | -               | 447.0933 | -          | -2.01 |
| Rutin                                 | 6.52 | -                                                                                    | standard solution                                                                    | -                | 609.1448 | -               | 609.1461 | -          | -2.13 |
| Hyperoside                            | 6.56 | 303.0491; 153.0168                                                                   | 301.0319;300.0271;<br>283.0248; 271.0246                                             | 465.1019         | 463.0874 | 465.1027        | 463.0882 | -1.72      | -1.73 |
| Isoquercitrin                         | 6.82 | 303.0515                                                                             | 301.0319;300.0271;<br>283.0248; 271.0246                                             | 487.084*         | 463.0874 | 487.085*        | 463.0882 | -2.05      | -1.73 |
| Quercetin<br>malonylhexoside          | 6.83 | 303.0488;285.0385;<br>257.0442;229.0493;<br>165.0167;153.0175;<br>149.021; 137.0228  | 301.0331;300.0271;<br>229.0188;151.0031;<br>107.105                                  | 551.1025         | 549.0872 | 551.1031        | 549.0885 | -1.09      | -2.18 |
| Quercitrin                            | 6.98 | standard solution                                                                    | standard solution                                                                    | 449.1067         | 447.0923 | 449.1078        | 447.0933 | -2.45      | -2.24 |
| Kaempferol<br>glucoside               | 7.05 | -                                                                                    | standard solution                                                                    | -                | 447.0924 | -               | 447.0933 | -          | -2.01 |
| Kaempferol<br>rutinoside              | 7.13 | 287.0539;258.0511;<br>231.0657;213.0491;<br>165.0152;153.0174;<br>133.0304; 121.0286 | 285.0394; 267.029;<br>255.0296;241.0511;<br>239.0336; 213.056;<br>199.0388; 151.0032 | 595.1645         | 593.1499 | 595.1657        | 593.1511 | -2.02      | -2.02 |

|                            |       |                                          |                                                                |          |          |          |          |       |       |
|----------------------------|-------|------------------------------------------|----------------------------------------------------------------|----------|----------|----------|----------|-------|-------|
| Kaempferol malonylhexoside | 7.53  | -                                        | 285.0383;267.0264;<br>239.0323;211.0382;<br>199.0412; 151.0023 | -        | 533.0926 | -        | 533.0937 | -     | -2.06 |
| Kaempferol                 | 8.61  | -                                        | standard solution                                              | -        | 285.0396 |          | 285.04   | -     | -1.4  |
| I3. II8 biapigenin         | 8.82  | 445.0533;387.0859;<br>153.0162; 121.0276 | 443.0401;385.0703;<br>151.0033                                 | 539.0965 | 537.0811 | 539.0973 | 537.0827 | -1.48 | -2.98 |
| Amentoflavone              | 9.95  | -                                        | standard solution                                              | -        | 537.0813 | -        | 537.0827 | -     | -2.61 |
| Pseudohypericin            | 10.25 | -                                        | 519.0704;487.0489;<br>475.0844                                 | -        | 519.0703 | -        | 519.0722 | -     | -3.66 |

\*M+Na

**Table S6: Tentatively identified compounds in *H. perforatum* extract**

| <i>H. perforatum</i>              |      |                                                                           |                                                                |                         |          |                        |          |            |       |
|-----------------------------------|------|---------------------------------------------------------------------------|----------------------------------------------------------------|-------------------------|----------|------------------------|----------|------------|-------|
| Compound name                     | Rt   | ESI+                                                                      | ESI-                                                           | <i>m/z</i> experimental |          | <i>m/z</i> theoretical |          | $\Delta m$ |       |
|                                   |      |                                                                           |                                                                | +                       | -        | +                      | -        | +          | -     |
| ProcyanidinB1                     | 2.28 | -                                                                         | standard solution                                              | -                       | 577.1329 | -                      | 577.1351 | -          | -3.81 |
| Catechin                          | 2.78 | standard solution                                                         | standard solution                                              | 291.0856                | 289.0714 | 291.0863               | 289.0717 | -2.4       | -1.04 |
| Chlorogenic acid                  | 3.46 | -                                                                         | standard solution                                              | -                       | 353.0871 | -                      | 353.0878 | -          | -1.98 |
| Procyanidin B type-Procyanidin C2 | 3.75 | -                                                                         | 695.1375; 452.102;<br>243.031; 161.0242;<br>125.0242           | -                       | 865.1968 | -                      | 865.1985 | -          | -1.96 |
| Epicatechin                       | 3.99 | standard solution                                                         | standard solution                                              | 291.0853                | 289.0716 | 291.0863               | 289.0717 | -3.43      | -0.35 |
| Kaempferol rhamnoside             | 4.52 | 287.0534; 269.048;<br>241.0479;213.0532;<br>259.059; 231.065;<br>153.0192 | -                                                              | 433.1115                | -        | 433.1129               | -        | -3.23      | -     |
| Myricetin glucoside               | 5.85 | -                                                                         | standard solution                                              | -                       | 479.0817 | -                      | 479.0831 | -          | -2.92 |
| Rutin                             | 6.49 | -                                                                         | standard solution                                              | -                       | 609.1444 | -                      | 609.1461 | -          | -2.79 |
| Miquelianin                       | 6.71 | -                                                                         | 301.0347;283.0252;<br>273.0389;229.0494;<br>151.0034; 107.0138 | -                       | 477.0663 | -                      | 477.0674 | -          | -2.51 |
| Isoquercitrin                     | 6.88 | 303.0498                                                                  | 301.0325; 300.0265;<br>283.0244; 229.0486                      | 487.0833*               | 463.0869 | 487.085*               | 463.0882 | -3.49      | -2.81 |



|                             |       |                   |                                                              |          |          |          |          |       |       |
|-----------------------------|-------|-------------------|--------------------------------------------------------------|----------|----------|----------|----------|-------|-------|
| Quercetin glucoside acetate | 7.48  | -                 | 300.0267;271.024;255.029;<br>227.0333                        | -        | 505.0971 | -        | 505.0988 | -     | -3.36 |
| Quercetin                   | 7.88  | standard solution | standard solution                                            | 303.0487 | 301.035  | 303.0499 | 301.0354 | -3.96 | -1.33 |
| I3. II8 biapigenin          | 8.84  | -                 | 443.0385; 385.0705;<br>151.0037                              | -        | 537.081  | -        | 537.0827 | -     | -3.16 |
| Amentoflavone               | 9.95  | -                 | standard solution                                            | -        | 537.081  | -        | 537.0827 | -     | -3.16 |
| Pseudohypericin             | 10.5  | -                 | 519.0695;487.0447;<br>475.0754                               | -        | 519.0705 | -        | 519.0722 | -     | -3.27 |
| Hypericin                   | 12.34 | -                 | standard solution                                            | -        | 503.0768 | -        | 503.0772 | -     | -0.79 |
| Hyperforin                  | 14.66 | standard solution | standard solution                                            | 537.3933 | 535.3773 | 537.3938 | 535.3793 | -0.93 | -3.73 |
| Adhyperforin                | 14.99 | -                 | 549.3954;480.3215;<br>411.2521;397.2372;<br>313.18; 289.1438 | -        | 549.3931 | -        | 549.3949 | -     | -3.29 |

\*M+Na

**Table S7: Tentatively identified compounds in *H. tetrapterum* extract**

| <i>H. tetrapterum</i>        |      |      |                                                                                      |                         |          |                        |          |            |       |
|------------------------------|------|------|--------------------------------------------------------------------------------------|-------------------------|----------|------------------------|----------|------------|-------|
| Compound name                | Rt   | ESI+ | ESI-                                                                                 | <i>m/z</i> experimental |          | <i>m/z</i> theoretical |          | $\Delta m$ |       |
|                              |      |      |                                                                                      | +                       | -        | +                      | -        | +          | -     |
| Chlorogenic Acid             |      |      | standard solution                                                                    | -                       | 353.0874 | -                      | 353.0878 | -          | -1.13 |
| Quercetin 3,4-di-O-glucoside | 5.7  | -    | standard solution                                                                    | -                       | 625.1398 | -                      | 625.141  | -          | -1.92 |
| Rutin                        | 6.46 | -    | standard solution                                                                    | -                       | 609.1448 | -                      | 609.1461 | -          | -2.13 |
| Isoquercitrin                | 6.97 | -    | 301.0333;300.0269;<br>271.0242;255.0303;<br>151.0047                                 | -                       | 463.0862 | -                      | 463.0882 | -          | -4.32 |
| Kaempferol rutinoside        | 7.15 | -    | 285.0393;267.0276;<br>255.0292;241.0485;<br>239.0323;213.0537;<br>199.0404; 151.0027 | -                       | 593.1495 | -                      | 593.1512 | -          | -2.87 |
| I3. II8 biapigenin           | 8.87 | -    | 443.0373;385.0698;<br>151.0035                                                       | -                       | 537.0808 | -                      | 537.0827 | -          | -3.54 |
| Amentoflavone                | 9.92 | -    | standard solution                                                                    | -                       | 537.0809 | -                      | 537.0827 | -          | -3.35 |

**Table S8: Tentatively identified compounds in *H. fragile* extract**

| <i>H. fragile</i>            |       |                       |                                                                                      |                  |          |                 |          |            |       |
|------------------------------|-------|-----------------------|--------------------------------------------------------------------------------------|------------------|----------|-----------------|----------|------------|-------|
| Compound name                | Rt    | ESI+                  | ESI-                                                                                 | m/z experimental |          | m/z theoretical |          | $\Delta m$ |       |
|                              |       |                       |                                                                                      | +                | -        | +               | -        | +          | -     |
| Chlorogenic acid             | 3.65  | -                     | standard solution                                                                    | -                | 353.0874 | -               | 353.0878 | -          | -1.13 |
| Quercetin 3,4-di-O-glucoside | 5.7   | -                     | standard solution                                                                    | -                | 625.1401 | -               | 625.1410 | -          | -1.44 |
| Rutin                        | 6.54  | standard solution     | standard solution                                                                    | 611.1583         | 609.1447 | 611.1607        | 609.1461 | -3.86      | -2.99 |
| Hyperoside                   | 6.58  | 303.0478;<br>155.0177 | 301.0229;300.01892;<br>271.0199                                                      | 465.1012         | 463.0876 | 465.1027        | 463.0882 | -3.22      | 1.29  |
| Isoquercitrin                | 6.96  | -                     | 301.0332;300.0281;<br>271.024; 255.0301;<br>151.0036                                 | -                | 463.0867 | -               | 463.0882 | -          | -3.24 |
| Kaempferol rutinoside        | 7.15  | -                     | 285.0393;267.0305;<br>255.0296;241.0499;<br>239.0337;213.0556;<br>199.0399; 151.0031 | -                | 593.1496 | -               | 593.1512 | -          | -2.7  |
| Quercetin                    | 7.87  | standard solution     | standard solution                                                                    | 303.0484         | 301.0349 | 303.0495        | 301.0354 | -3.63      | -1.66 |
| I3.II8 biapigenin            | 8.88  | -                     | 443.0384;385.0707;<br>151.0035                                                       | -                | 537.0808 | -               | 537.0827 | -          | -3.54 |
| Amentoflavone                | 9.91  | -                     | standard solution                                                                    | -                | 537.0806 | -               | 537.0827 | -          | -3.91 |
| Pseudohypericin              | 10.36 | -                     | 519.0706; 487.042;<br>475.0797                                                       | -                | 519.0706 | -               | 519.0722 | -          | -3.08 |
| Hyperforin                   | 14.56 | -                     | standard solution                                                                    | -                | 535.3775 | -               | 535.3793 | -          | -3.36 |

**Table S9: Tentatively identified compounds in *H. olympicum* extract**

| <i>H. olympicum</i>   |      |                                |                                          |                  |          |                 |          |            |       |
|-----------------------|------|--------------------------------|------------------------------------------|------------------|----------|-----------------|----------|------------|-------|
| Compound name         | Rt   | ESI+                           | ESI-                                     | m/z experimental |          | m/z theoretical |          | $\Delta m$ |       |
|                       |      |                                |                                          | +                | -        | +               | -        | +          | -     |
| Neo-chlorogenic acid  | 2.24 | -                              |                                          | -                | 353.0877 | -               | 353.0878 | -          | -2.26 |
| Chlorogenic acid      | 3.69 |                                | standard solution                        | -                | 353.0871 | -               | 353.0878 |            | 1.98  |
| Myricetin glucoside   | 5.85 | standard solution              | standard solution                        | 481.0953         | 479.0822 | 481.0977        | 479.0832 | -4.93      | -2.09 |
| Myricetin arabinoside | 6.21 | 319.0423;153.0169;<br>165.0167 | 316.0214;299.0162;<br>271.0239;151.0024; | 451.0853         | 449.0714 | 451.0871        | 449.0725 | -3.99      | -2.45 |

|                    |       |                                            |                                          |          |          |          |          |       |       |
|--------------------|-------|--------------------------------------------|------------------------------------------|----------|----------|----------|----------|-------|-------|
|                    |       |                                            | 137.0252                                 |          |          |          |          |       |       |
| Rutin              | 6.54  | -                                          | standard solution                        | -        | 609.1449 | -        | 609.1461 | -     | -1.97 |
| Hyperoside         | 6.56  | 303.0477;<br>285.0384;273.0377;<br>229.047 | 316.0225;301.0300;<br>281.1023;151.0052  | 465.1007 | 463.0873 | 465.1027 | 463.0882 | -4.41 | -1.94 |
| Isoquercitrin      | 6.84  | -                                          | 300.0268;271.0244;<br>255.0294; 151.0031 | -        | 463.0868 | -        | 463.0882 | -     | -3.02 |
| Quercetin          | 7.86  | -                                          | standard solution                        | -        | 301.035  | -        | 301.0354 | -     | -1.33 |
| I3. II8 biapigenin | 8.84  | -                                          | 443.0378;385.0713;<br>151.0032           | -        | 537.0812 | -        | 537.0827 | -     | -2.79 |
| Amentoflavone      | 9.96  | -                                          | standard solution                        | -        | 537.0814 | -        | 537.0827 | -     | -2.42 |
| Pseudohypericin    | 10.35 | -                                          | 519.0703;487.0437;<br>421.1124           | -        | 519.0712 | -        | 519.0721 | -     | -1.73 |

**Table S10: Tentatively identified compounds in *H.delphicum* extract**

| <i>H. delphicum</i>                   |      |                                                                                |                                                                |                  |          |                 |          |       |       |
|---------------------------------------|------|--------------------------------------------------------------------------------|----------------------------------------------------------------|------------------|----------|-----------------|----------|-------|-------|
| Compound name                         | Rt   | ESI+                                                                           | ESI-                                                           | m/z experimental |          | m/z theoretical |          | Δm    |       |
|                                       |      |                                                                                |                                                                | +                | -        | +               | -        | +     | -     |
| Neo-chlorogenic acid                  |      |                                                                                | 191.0579;<br>135.0452; 85.0301                                 |                  | 353.0874 |                 | 353.0878 | -     | -1.32 |
| Chlorogenic acid                      | 3.45 | -                                                                              | standard solution                                              | -                | 353.0880 | -               | 353.0878 | -     | 0.56  |
| Procyanidin B type-<br>Procyanidin C2 | 3.75 | -                                                                              | 713.1532;695.1414;<br>243.0308;161.0241;<br>125.0239; 577.1331 | -                | 865.1966 | -               | 865.1985 | -     | -2.2  |
| Epicatechin                           | 4.08 | standard solution                                                              | standard solution                                              | 291.0849         | 289.0715 | 291.0863        | 289.0717 | -4.81 | -0.69 |
| Kaempferol rhamnoside                 | 4.38 | 287.053;269.0402;241.0465;<br>259.0594; 231.064;<br>241.0465;213.0534;165.0172 | -                                                              | 433.1108         | -        | 433.1129        | -        | -4.85 | -     |
| Myricetin glucoside                   | 5.83 | -                                                                              | standard solution                                              | -                | 479.0818 | -               | 479.0831 | -     | -2.71 |
| Rutin                                 | 6.57 | -                                                                              | standard solution                                              | -                | 609.1449 | -               | 609.1461 | -     | 1.97  |
| Hyperoside                            | 6.58 | 303.0479;153.0169                                                              | 301.0325;300.0272;<br>283.0242;271.0245                        | 465.1007         | 463.0874 | 465.1027        | 463.0882 | -4.3  | -1.73 |
| Isoquercitrin                         | 6.73 | 303.0481;153.0174                                                              | 301.0321;300.0270;                                             | 465.1006         | 463.0872 | 465.1027        | 463.0882 | -4.51 | -2.16 |

|                                |       |                            |                                                      |          |          |          |          |       |       |
|--------------------------------|-------|----------------------------|------------------------------------------------------|----------|----------|----------|----------|-------|-------|
|                                |       |                            | 271.0245;255.0295;<br>151.0035                       |          |          |          |          |       |       |
| Quercitrin                     | 7.15  | -                          | standard solution                                    | -        | 447.0921 | -        | 447.0933 | -     | -2.68 |
| Quercetin<br>arabinofuranoside | 7.18  | -                          | 301.032; 300.0264;<br>283.0223;271.0244;<br>151.0033 | -        | 433.0763 | -        | 433.0776 | -     | -3    |
| I3. II8 biapigenin             | 8.84  | 445.0528; 387.084; 153.017 | 443.0365;385.0709;<br>151.0035                       | 539.0972 | 537.081  | 539.0947 | 537.0827 | -4.51 | 4.63  |
| Amentoflavone                  | 9.9   | -                          | standard solution                                    | -        | 537.0813 | -        | 537.0827 | -     | -2.6  |
| Pseudohypericin                | 10.36 | -                          | 519.0706;487.042;<br>475.0797                        | -        | 519.0706 | -        | 519.0722 | -     | -3.08 |
| Hypericin                      | 12.44 | -                          | standard solution                                    | -        | 503.0777 | -        | 503.0772 | -     | 0.99  |

TIC chromatograms of *Hypericum* species at the negative ionization mode

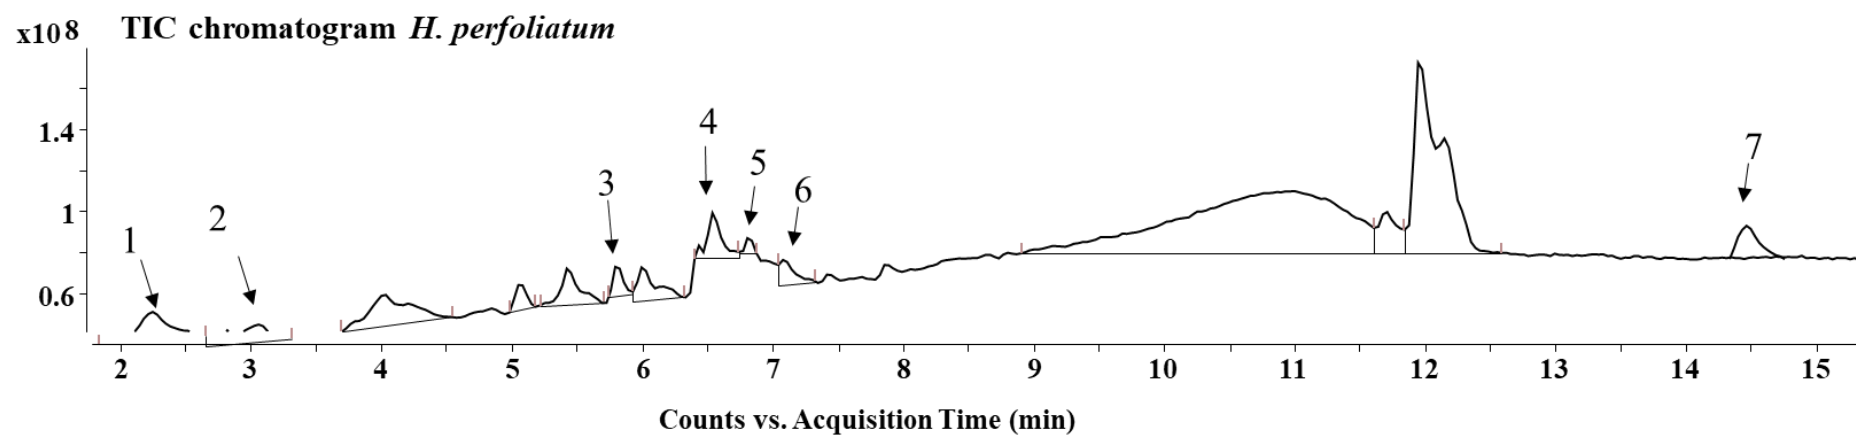

**Figure S1:** TIC chromatogram of *H. perfoliatum* extract. **1:** procyanidin B1; **2:** procyanidin B type; **3:** apigenin hexoside; **4:** rutin; **5:** quercetin malonylhexoside; **6:** quercitrin; **7:** hyperforin

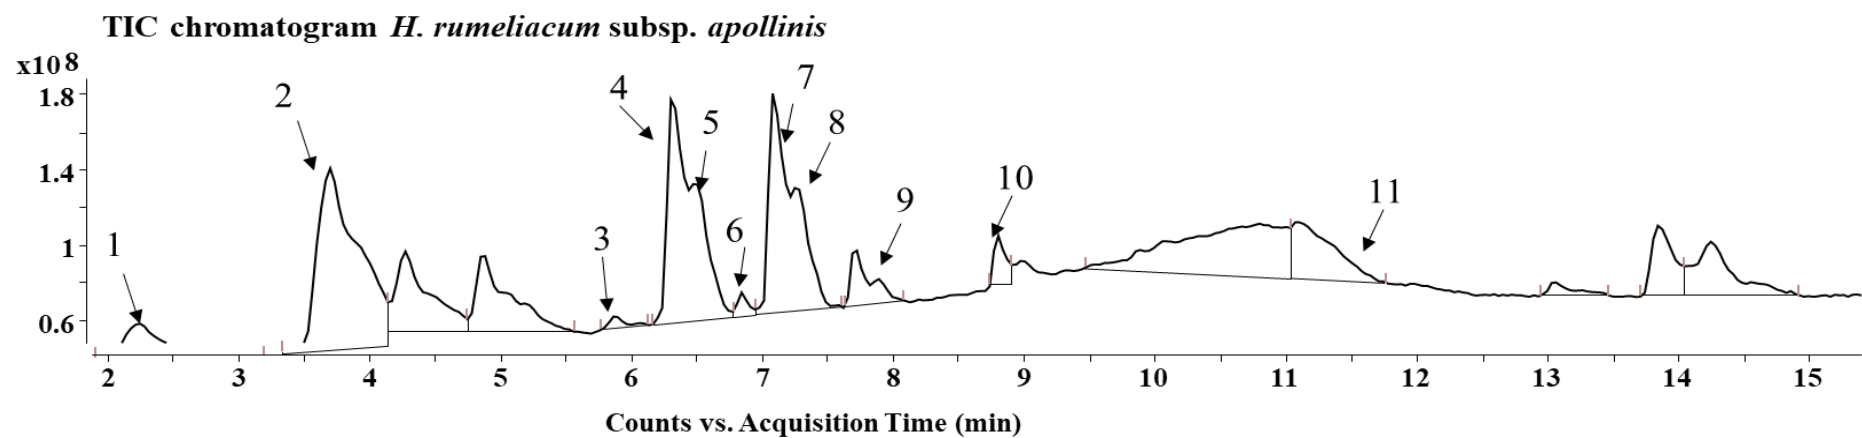

**Figure S2:** TIC chromatogram of *H. rumeliacum* subsp. *apollinis* extract. **1:** neo-chlorogenic acid; **2:** chlorogenic acid; **3:** myricetin glucoside; **4:** myricitrin; **5:** rutin; **6:** isoquercitrin; **7:** kaempferol glucoside; **8:** quercitrin; **9:** quercetin; **10:** I3, II8 biapigenin; **11:** protohypericin

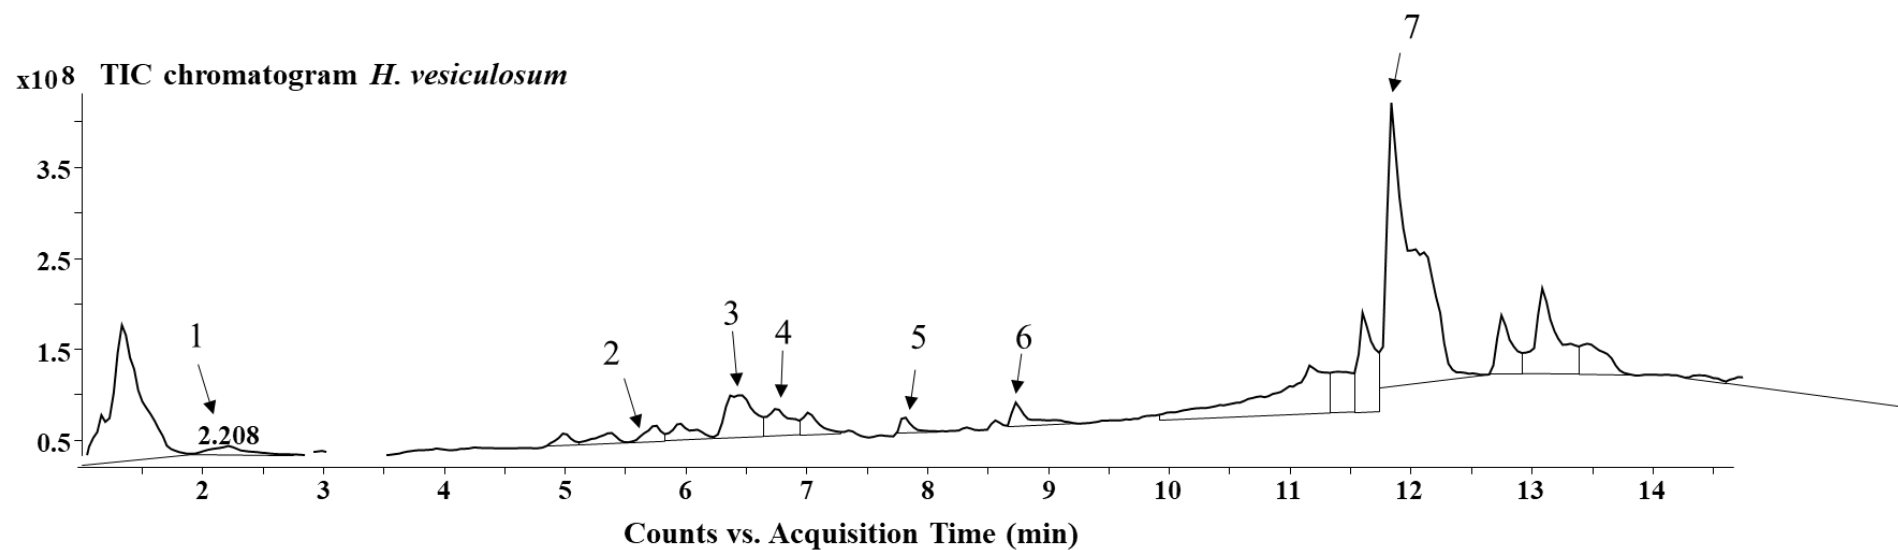

**Figure S3:** TIC chromatogram of *H. vesiculosum* extract. **1:** neo-chlorogenic acid; **2:** myricetin glucoside; **3:** quercetin malonylhexoside; **4:** isoquercitrin; **5:** quercetin; **6:** I3, II8 biapigenin; **7:** protohypericin

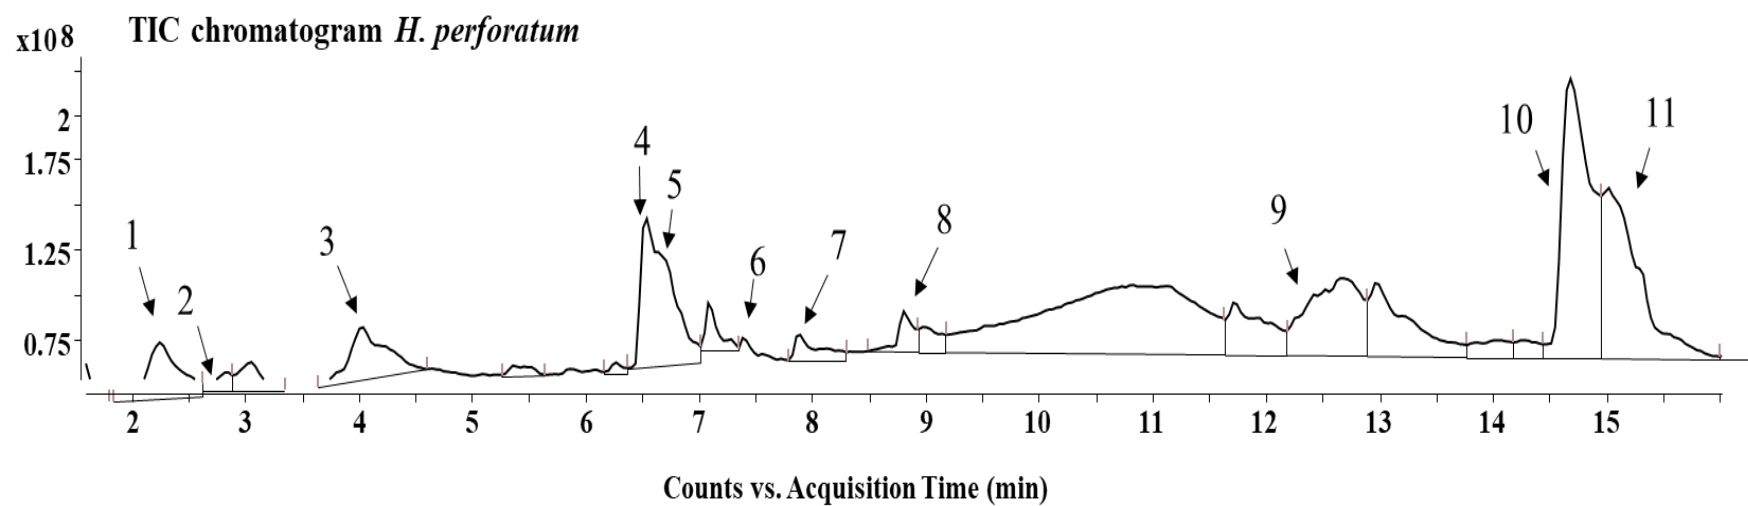

**Figure S4:** TIC chromatogram of *H. perforatum* extract. **1:** procyanidin B1; **2:** catechin; **3:** epicatechin; **4:** myricetin glucoside; **5:** rutin; **6:** quercetin glucoside acetate; **7:** quercetin; **8:** I3, II8 biapigenin; **9:** hypericin; **10:** hyperforin; **11:** adhyperforin



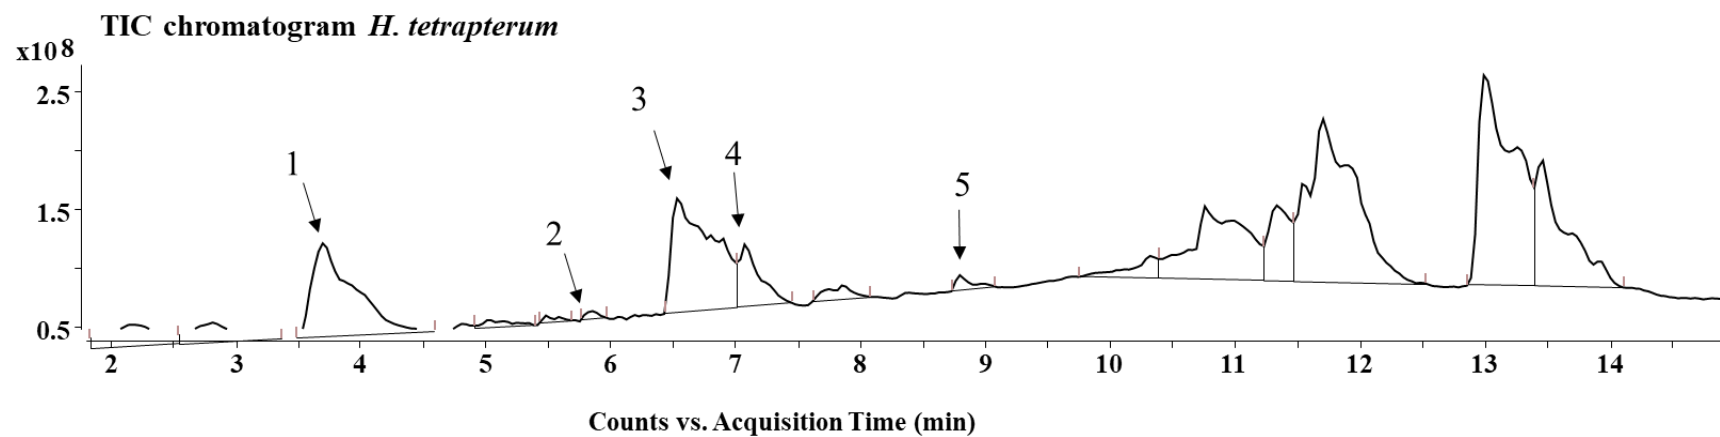

**Figure S5:** TIC chromatogram of *H. tetrapterum* extract. **1:** chlorogenic acid; **2:** quercetin 3,4-di-O-glucoside; **3:** rutin; **4:** isoquercitrin; **5:** I3, II8 biapigenin glucoside

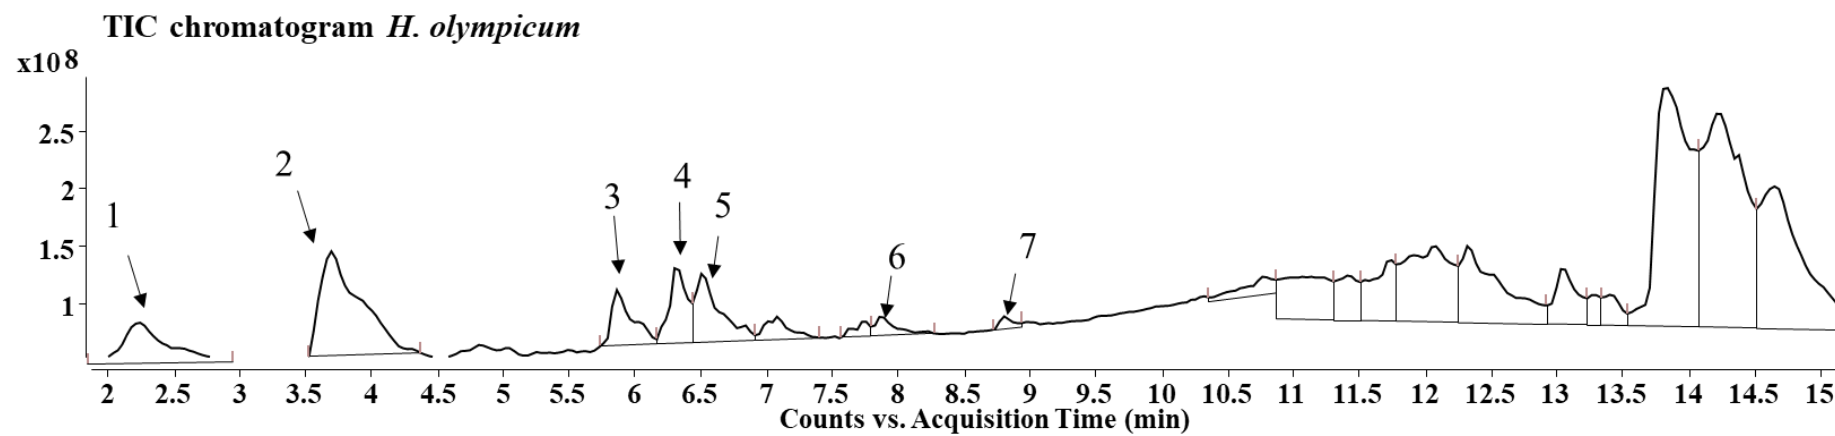

**Figure S6:** TIC chromatogram of *H. olympicum* extract. 1: Neo-chlorogenic acid; 2: chlorogenic acid; 3: myricetin glucoside; 4: myricetin arabinoside; 5: rutin; 6: quercetin; 7: I3, II8 biapigenin

**Figure S7:** Mass spectrum of *H. delphicum* extract

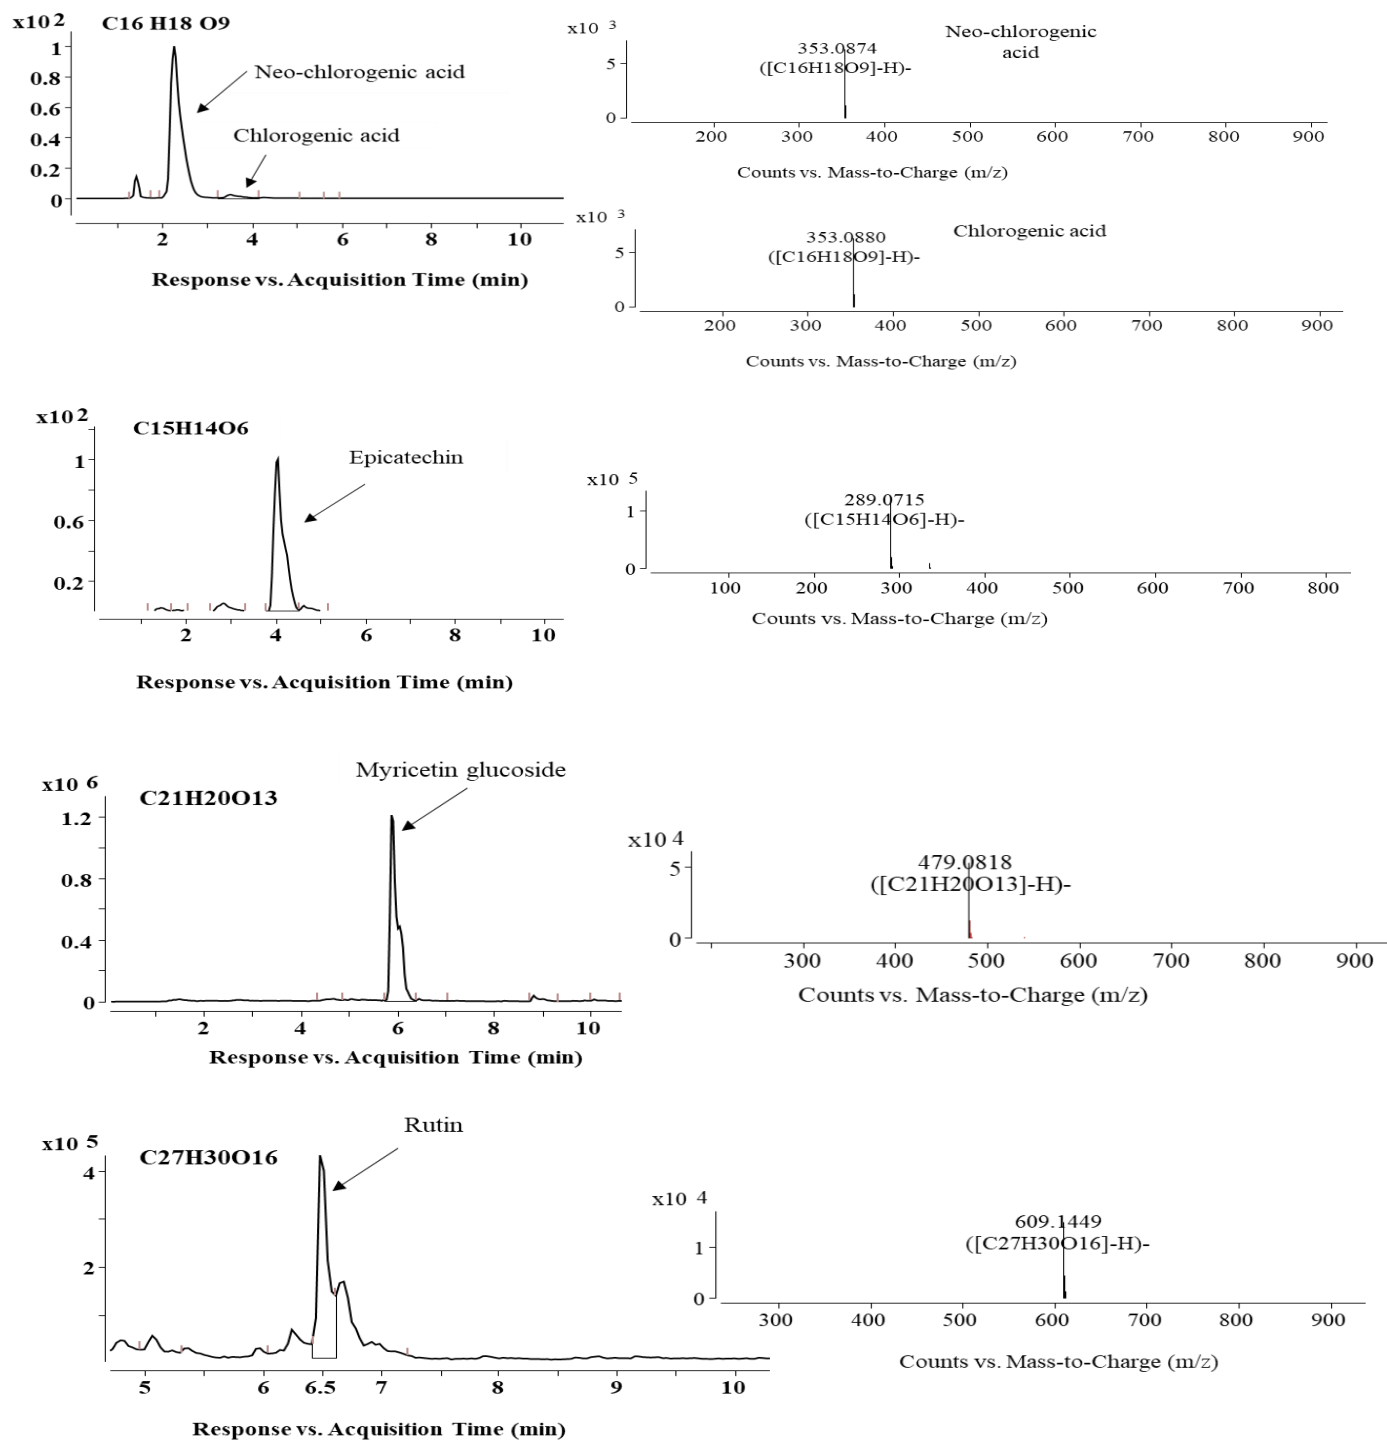

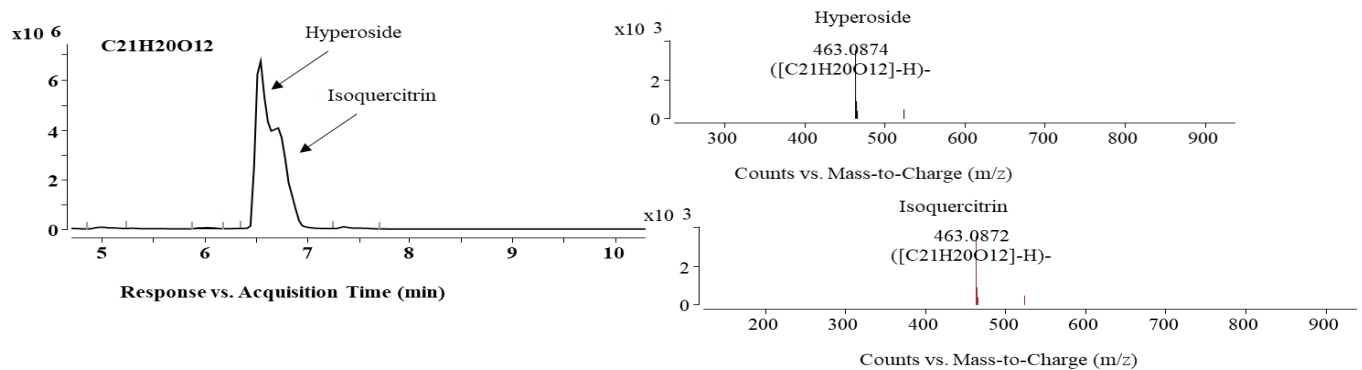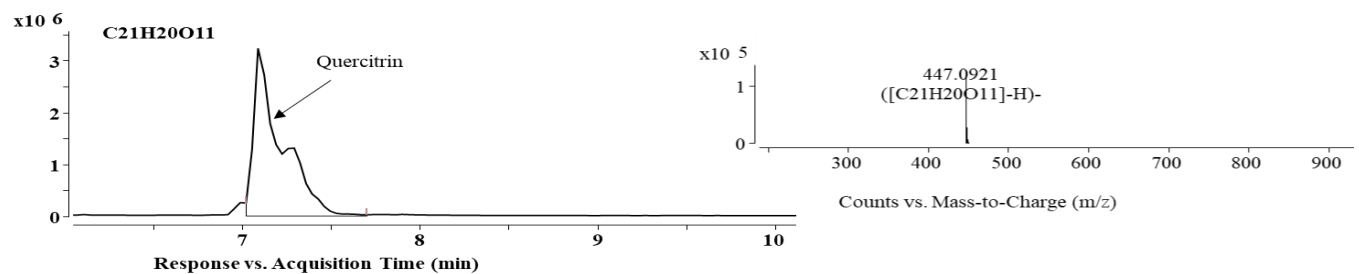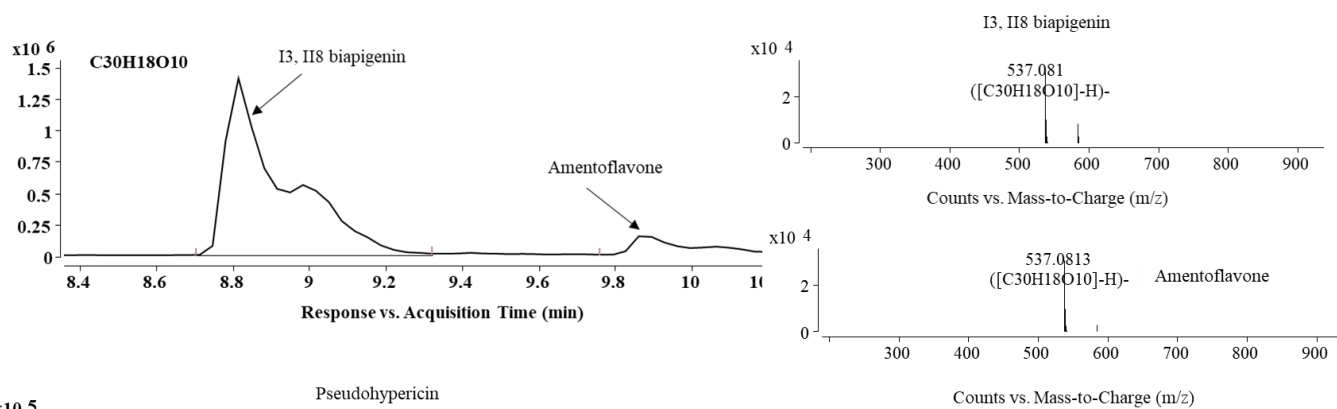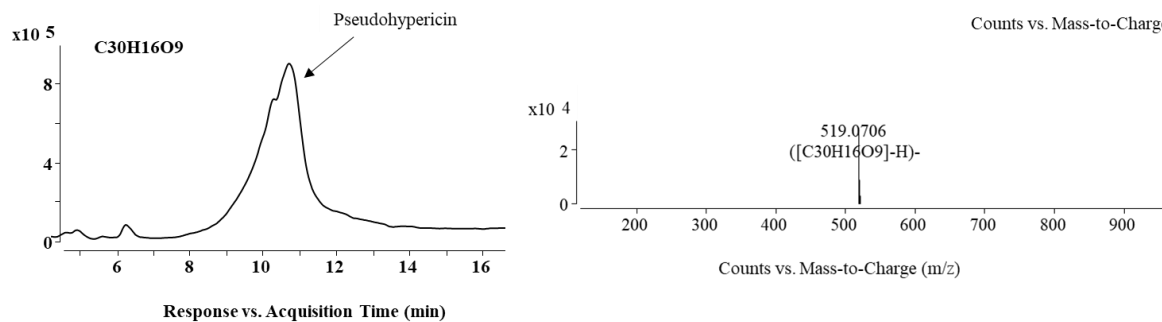

**Figure S8:** Mass spectrum of *H. cycladicum* extract

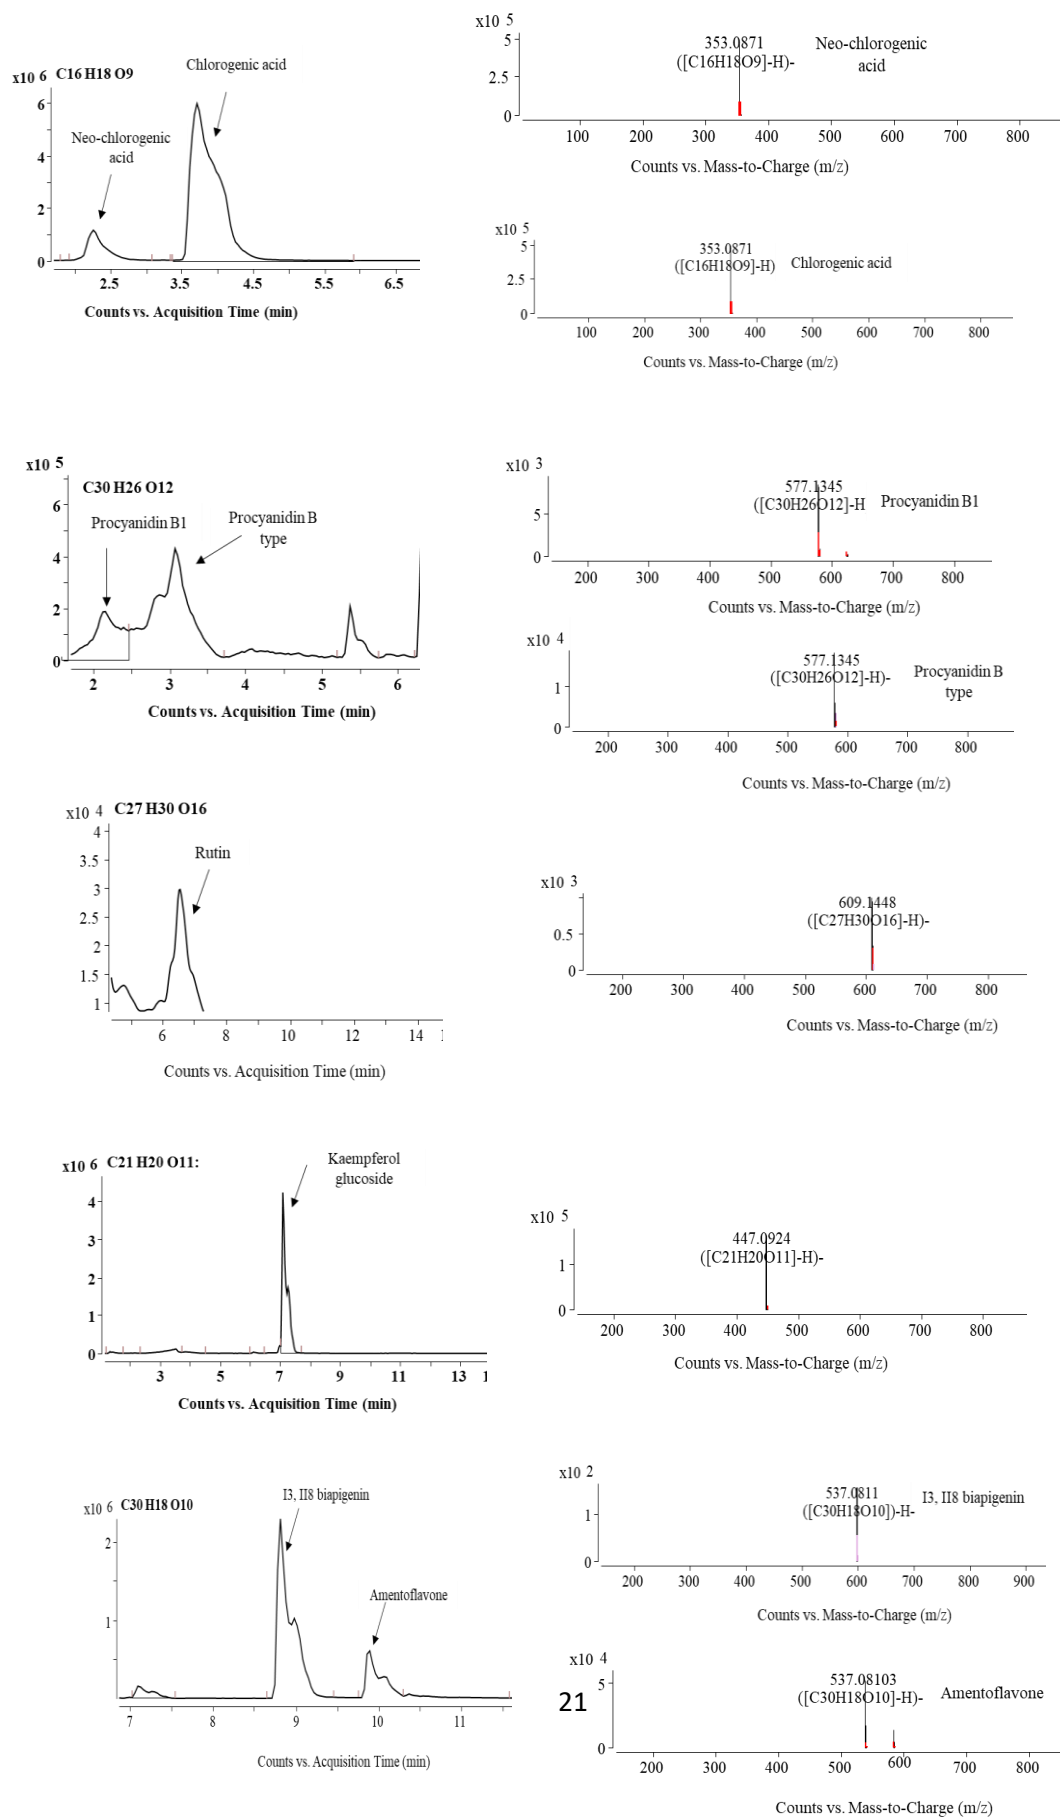

**Figure S9:** Mass spectra of *H. fragile* extract

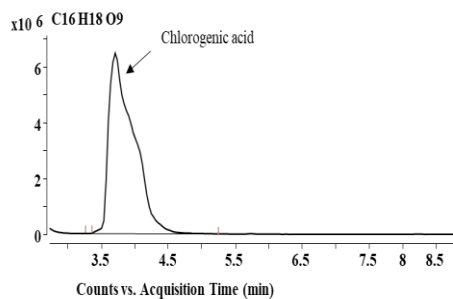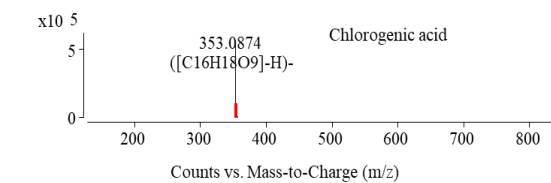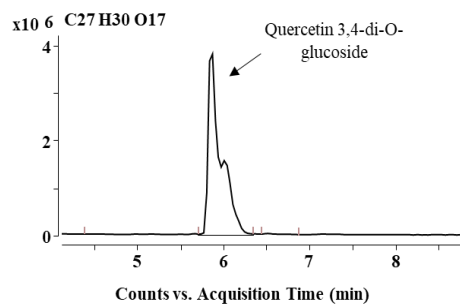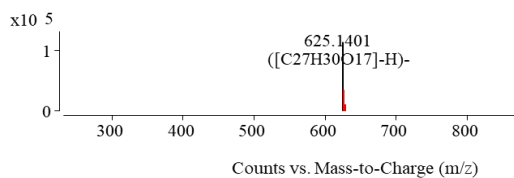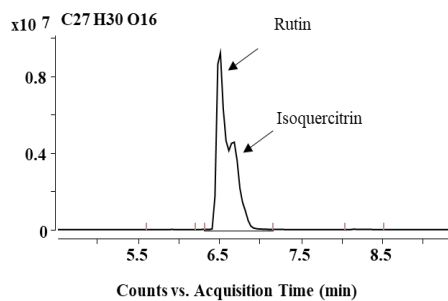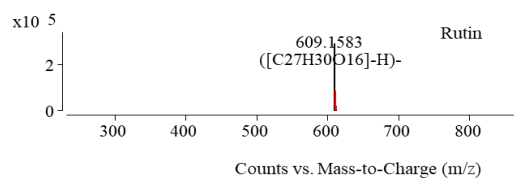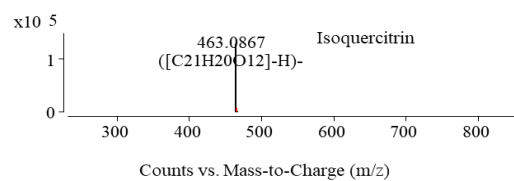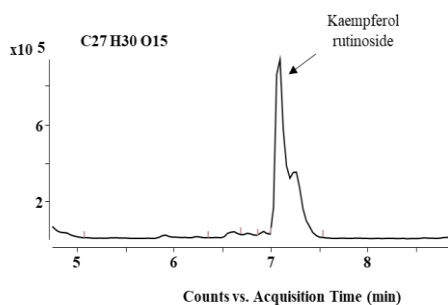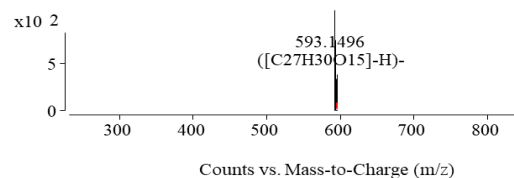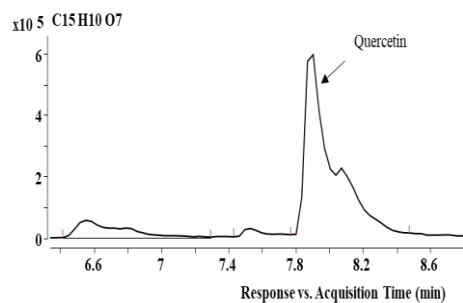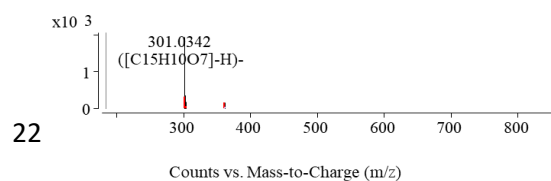

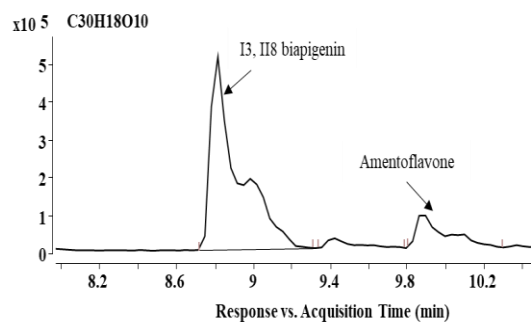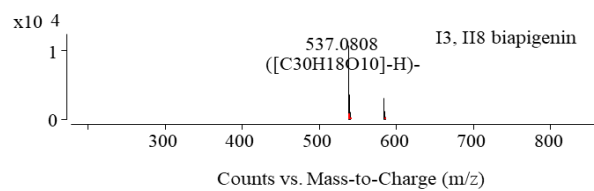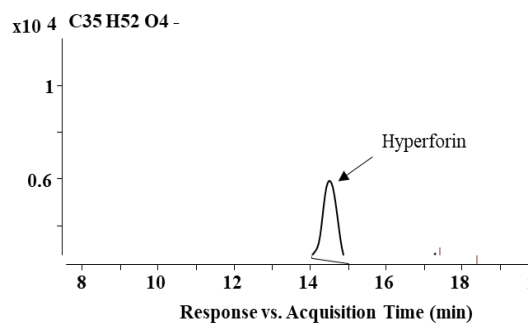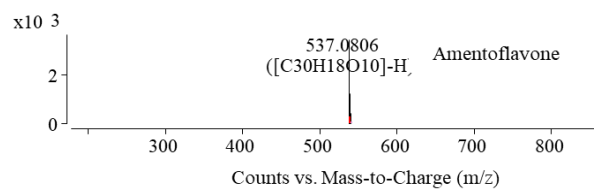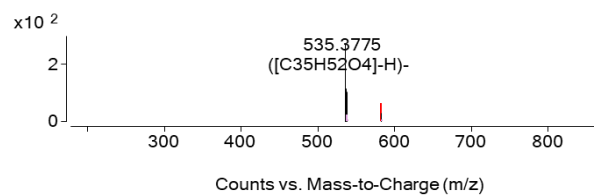

Supplement: s1 [file s1]
